# Supplementary material for: Versatile functionalities in MOFs assembled from the same building units: interplay of structural flexibility, rigidity and regularity
Source: Royal Society of Chemistry journal article supplement (doi:10.1039/b917029d), 2009-12-24
Supplement: b917029d.pdf [file b917029d.pdf]

## Versatile functionalities in MOFs assembled from the same building units: Interplay of structural flexibility, rigidity and regularity

**Prakash Kanoo, K. L. Gurunatha, Tapas Kumar Maji\***

*Molecular Materials Laboratory, Chemistry and Physics of Materials Unit, Jawaharlal Nehru Centre for Advanced Scientific Research, Jakkur, Bangalore-560064, India*

\*Tel: (+91) 80 2208 2826, Fax: (+91) 80 2208 2766, E-mail: [tmaji@jncasr.ac.in](mailto:tmaji@jncasr.ac.in).

**Table S1:** Selected Bond lengths (Å) and angles (°) for **1**

|               |            |               |            |
|---------------|------------|---------------|------------|
| Cu1 - O1      | 1.9682(19) | Cu1 - O2      | 1.9617(19) |
| Cu1 - O3      | 1.9728(19) | Cu1 - O4      | 1.958(2)   |
| Cu1 - O5      | 2.126(2)   |               |            |
|               |            |               |            |
| O1 - Cu1 - O2 | 169.16(9)  | O1 - Cu1 - O3 | 89.37(9)   |
| O1 - Cu1 - O4 | 91.30(9)   | O1 - Cu1 - O5 | 94.01(8)   |
| O2 - Cu1 - O3 | 88.93(9)   | O2 - Cu1 - O4 | 88.29(9)   |
| O2 - Cu1 - O5 | 96.83(8)   | O3 - Cu1 - O4 | 168.64(9)  |
| O3 - Cu1 - O5 | 98.04(8)   | O4 - Cu1 - O5 | 93.23(8)   |

**Table S2:** Selected Bond lengths (Å) and angles (°) for **2**

|                   |          |                   |          |
|-------------------|----------|-------------------|----------|
| Cu1 - O1          | 1.973(5) | Cu1 - O5          | 2.136(5) |
| Cu1 - O2_a        | 1.950(5) | Cu1 - O4_b        | 1.951(5) |
| Cu1 - O3_d        | 1.957(5) |                   |          |
|                   |          |                   |          |
| O1 - Cu1 - O5     | 93.5(2)  | O1 - Cu1 - O2_a   | 88.8(2)  |
| O1 - Cu1 - O4_b   | 170.0(2) | O1 - Cu1 - O3_d   | 88.5(2)  |
| O2_a - Cu1 - O5   | 95.4(2)  | O4_b - Cu1 - O5   | 96.5(2)  |
| O3_d - Cu1 - O5   | 96.8(2)  | O2_a - Cu1 - O4_b | 88.9(2)  |
| O2_a - Cu1 - O3_d | 167.6(2) | O3_d - Cu1 - O4_b | 91.6(2)  |

Symmetry codes : a = -x, y, 3/2 - z ; b = -1/2 + x, -1/2 + y, 3/2 - z ; d = 1/2 - x, -1/2 + y, z

**Table S3:** Selected Bond lengths (Å) and angles (°) for **3**

|               |           |               |           |
|---------------|-----------|---------------|-----------|
| Cu1-O1        | 1.939(6)  | Cu1-O1W       | 2.100(14) |
| Cu1-O1_a      | 1.939(6)  | Cu1-O1_b      | 1.939(6)  |
| Cu1-O1_c      | 1.939(6)  |               |           |
|               |           |               |           |
| O1-Cu1-O1W    | 95.75(17) | O1-Cu1-O1_a   | 89.43(3)  |
| O1-Cu1-O1_b   | 168.5(3)  | O1-Cu1-O1_c   | 89.43(3)  |
| O1_a-Cu1-O1W  | 95.75(17) | O1_b-Cu1-O1W  | 95.75(17) |
| O1_c-Cu1-O1W  | 95.75(17) | O1_a-Cu1-O1_b | 89.43(3)  |
| O1_a-Cu1-O1_c | 168.5(3)  | O1_b-Cu1-O1_c | 89.43(3)  |

$$a = 1-y, x, z; b = 1-x, 1-y, z; c = y, 1-x, z$$

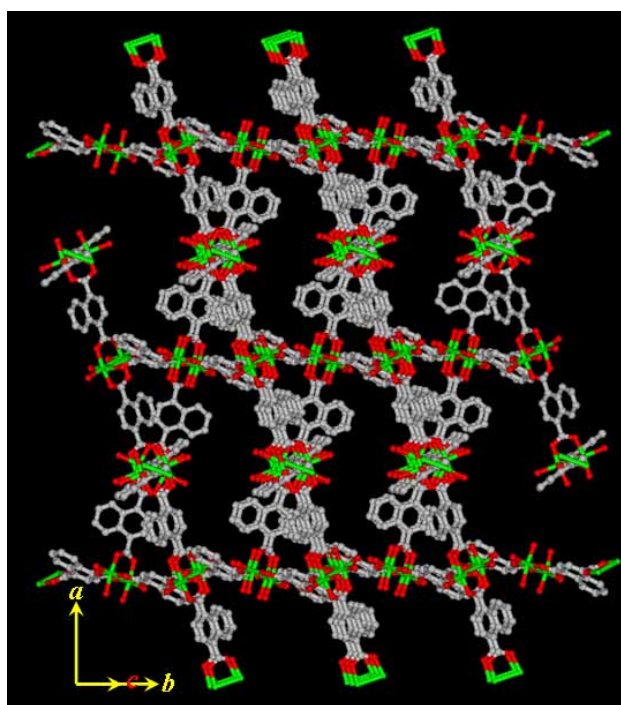

**Fig. S1** View of a single 3D net in **1**. Color specification: Cu, green; O, red; C, grey. Guest water molecules are not shown for clarity.

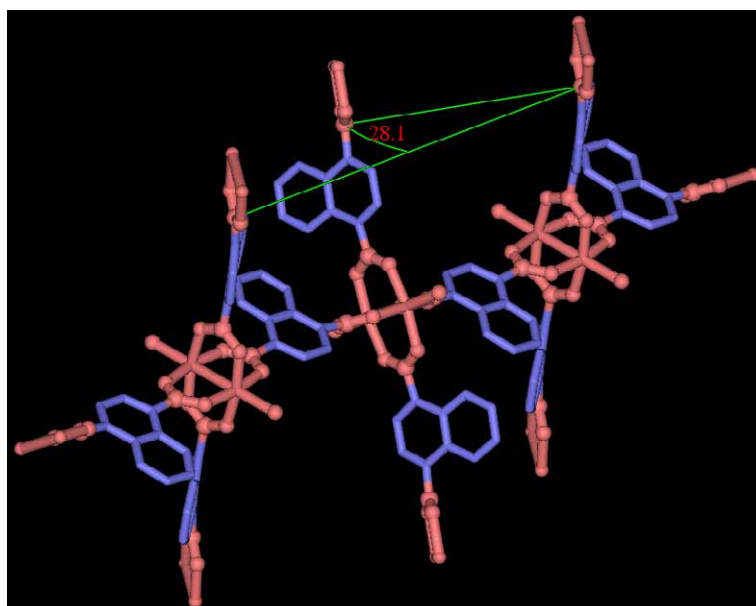

**Fig. S2** Perspective view of the paddle-wheels showing the bending of neighbouring paddle-wheels by  $28.1^\circ$  which dictates the formation of 3D structure.

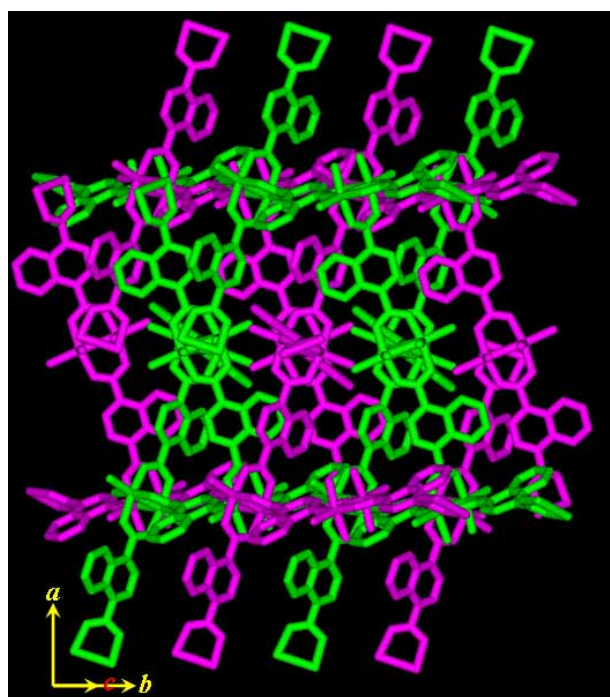

**Fig. S3** Unusual two-fold interpenetrated 3D network found in compound **1**. The two-folds are designated with green and pink color. Guest water molecules are not shown for clarity.

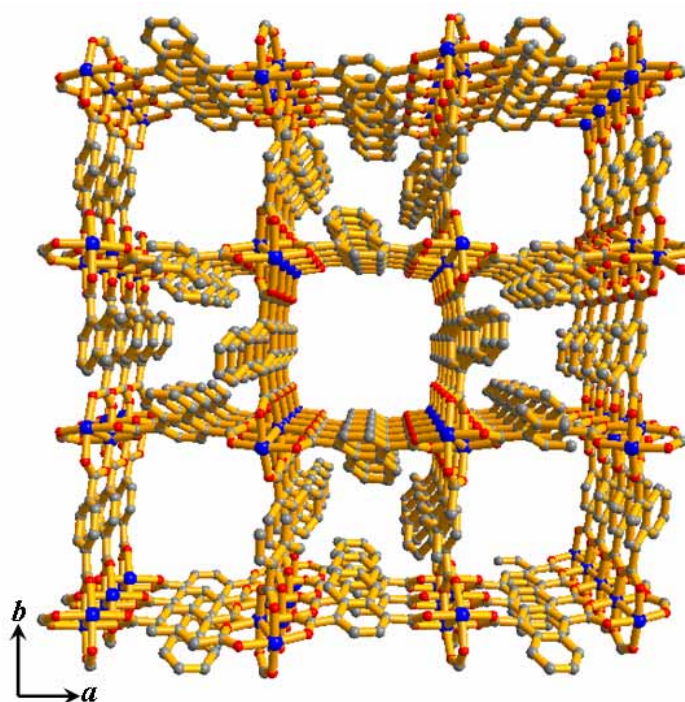

**Fig. S4** Perspective view of the 3D coordination framework **1** showing two different channels along *c*-direction (pendent benzene rings align in one channels forming hydrophobic nature).

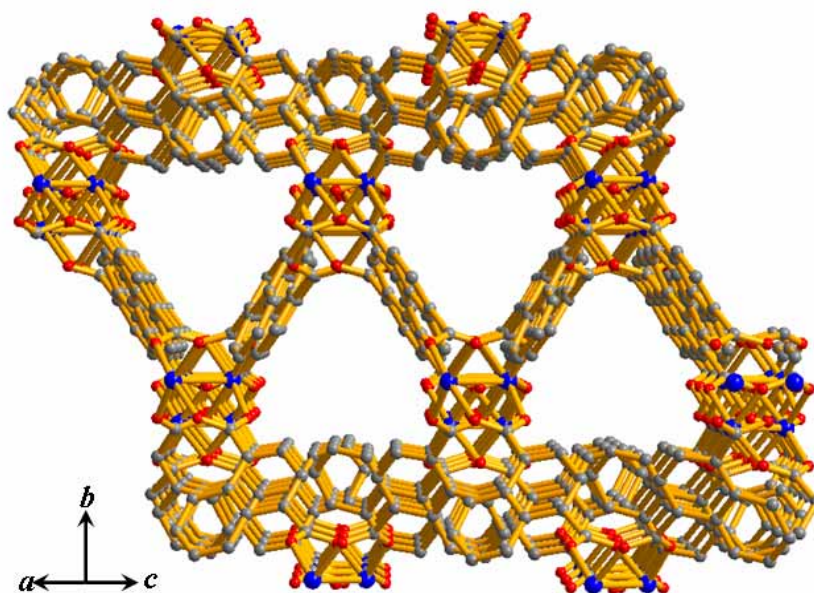

**Fig. S5** Three dimensional view of **2** showing the presence of triangular channels.

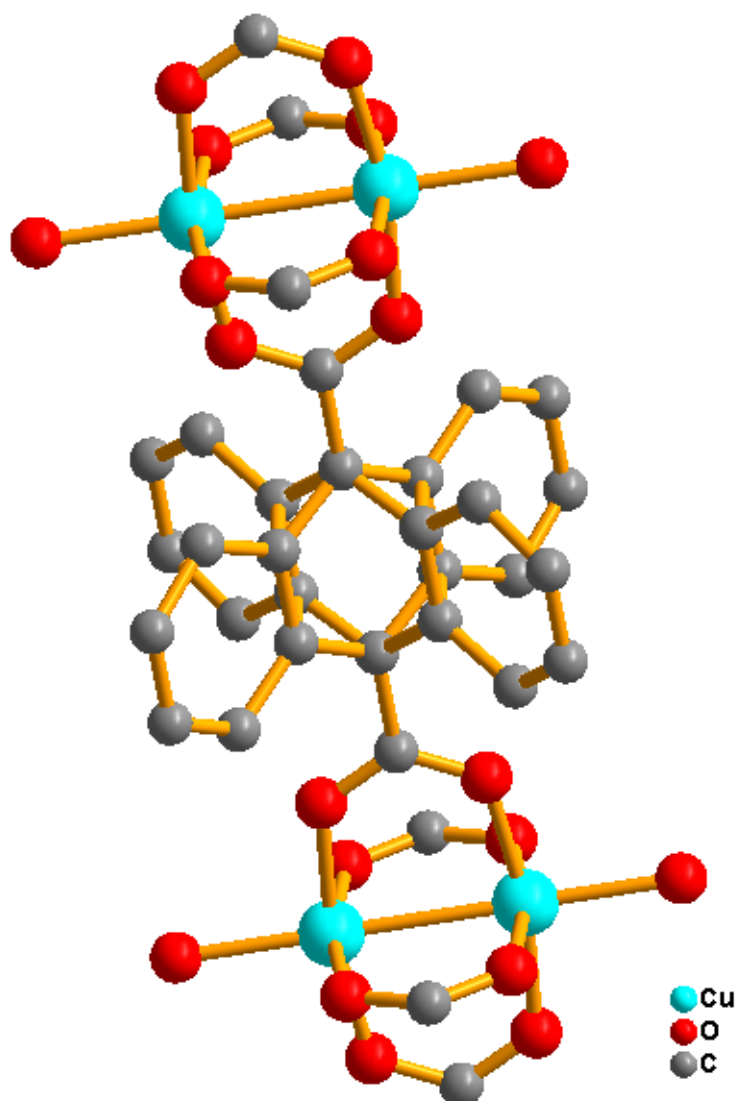

**Fig. S6** Figure shows the presence of 4-fold disorder in the naphthalene ring of 1,4-ndc ligand in compound **3**.

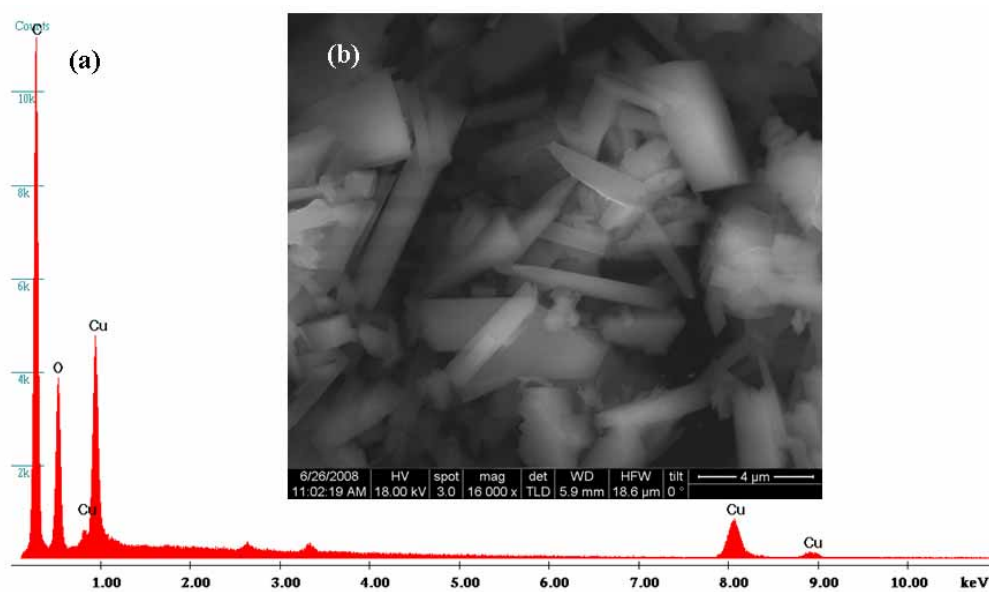

Fig. S7 EDX analysis and FESEM images (inset) for compound **4** showing micron size crystals.

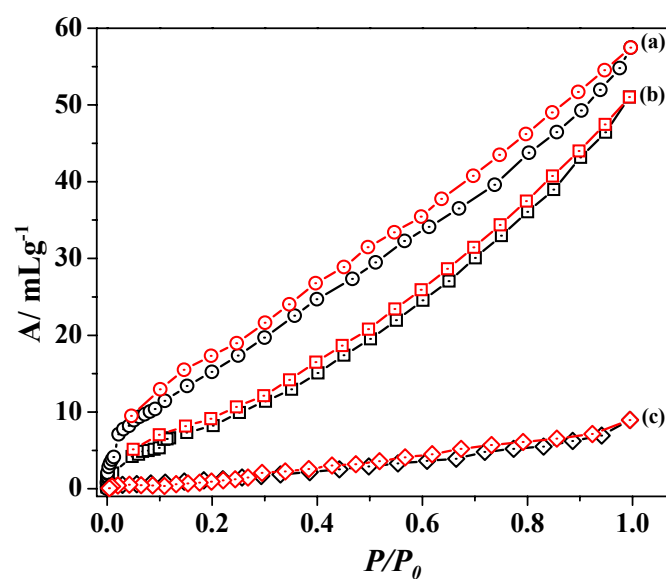

Fig. S8  $\text{N}_2$  adsorption isotherm for **1'** (b), **2'**(a) and **4'**(c) measured at 77 K ( $P_0$  is the saturated vapour pressure of  $\text{N}_2$ ).

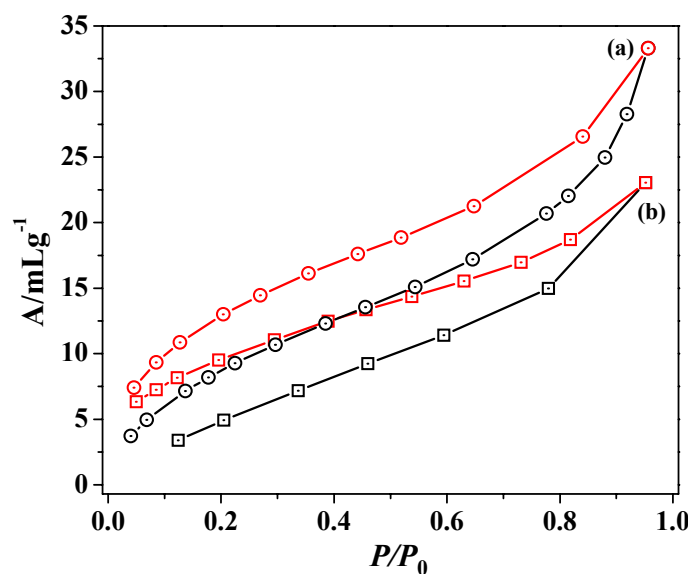

**Fig. S9** Vapor sorption isotherms for **3'**; (a) MeOH at 293 K; and (b) H<sub>2</sub>O at 298 K ( $P_0$  is the saturated vapour pressure of the solvents at respective temperature).

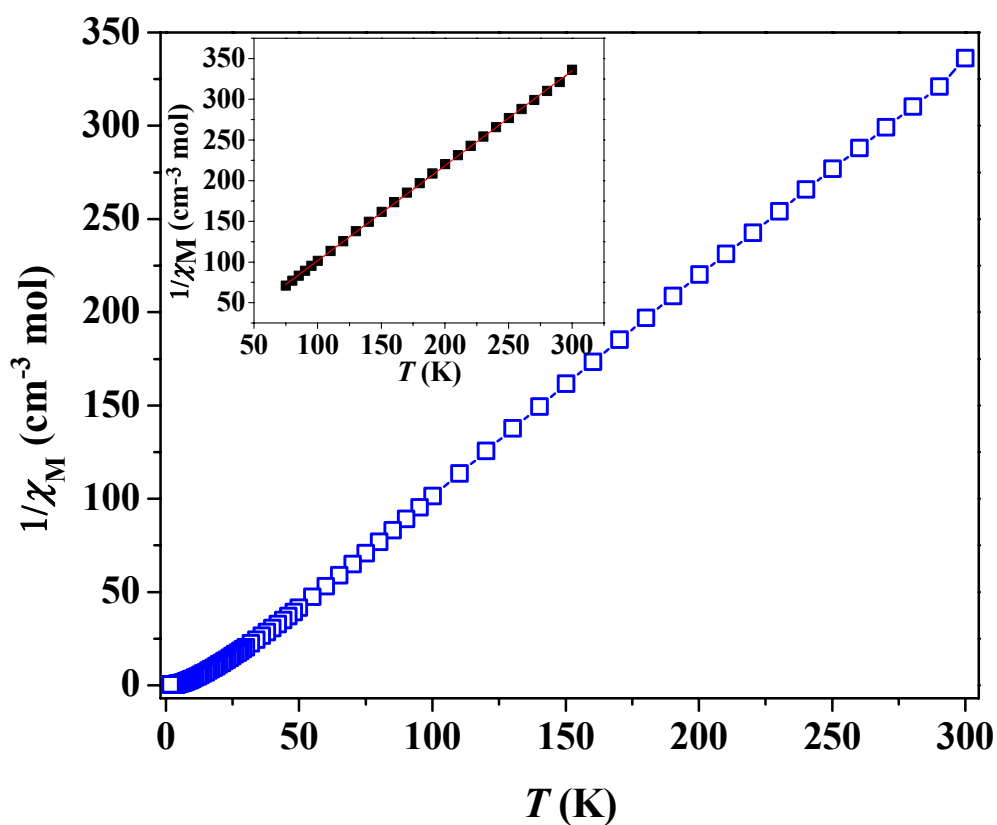

**Fig. S10** Plot of temperature dependency of  $\chi_M^{-1}$  for **4**. Inset shows the Curie-Weiss fitting in the temperature range 75–300 K.
